# Supplementary material
Source: PubMed Central journal article supplement (PMC11028284)
Supplement: 262_2019_2414_MOESM1_ESM.pdf [file 262_2019_2414_MOESM1_ESM.pdf]

**Supplementary Table 1**

**Mouse chemokine array coordinates**

| Coordinate       | Analyte/Control                       | Entrez ID   | Gene | Alternate Nomenclature            |
|------------------|---------------------------------------|-------------|------|-----------------------------------|
| A1, A2, A19, A20 | Reference Spots                       | N/A         |      | RS                                |
| B3, B4           | 6Ckine                                | 18829       |      | CCL21, SLC, Exodus-2              |
| B5, B6           | BLC                                   | 55985       |      | CXCL13, BCA-1                     |
| B7, B8           | C10                                   | 20305       |      | CCL6, MRP-1                       |
| B9, B10          | Component C5/C5a                      | 15139       |      | C5/C5a                            |
| B11, B12         | CCL28                                 | 56838       |      | MEC                               |
| B13, B14         | Chemerin                              | 71660       |      | RARRES2                           |
| B15, B16         | CTACK                                 | 20301       |      | CCL27, ALP, ILC, ESkin            |
| B17, B18         | CXCL16                                | 66102       |      | SRPSOX                            |
| C3, C4           | Eotaxin                               | 20292       |      | CCL11                             |
| C5, C6           | Fractalkine                           | 20312       |      | CX3CL1                            |
| C7, C8           | IL-16                                 | 16170       |      | -                                 |
| C9, C10          | IP-10                                 | 15945       |      | CXCL10, CRG-2, C7                 |
| C11, C12         | I-TAC                                 | 56066       |      | CXCL11, H174, SCYB9B              |
| C13, C14         | JE                                    | 20296       |      | CCL2, MCP-1                       |
| C15, C16         | KC                                    | 14825       |      | CXCL1                             |
| C17, C18         | LIX                                   | 20311       |      | CXCL5, GCP-2, ENA-78              |
| D3, D4           | MCP-2                                 | 20307       |      | CCL8, HC14                        |
| D5, D6           | MCP-5                                 | 20293       |      | CCL12                             |
| D7, D8           | MDC                                   | 20299       |      | CCL22, ABCD-1                     |
| D9, D10          | MIG                                   | 17329       |      | CXCL9, CRG-10, CMK                |
| D11, D12         | MIP-1 $\alpha/\beta$ (pan)            | 20302/20303 |      | CCL3/CCL4                         |
| D13, D14         | MIP-1 $\gamma$                        | 20308       |      | CCL9/10, CCF18, MRP-2             |
| D15, D16         | MIP-2                                 | 20310       |      | CXCL2, GRO $\beta$ , GRO2, CINC-3 |
| D17, D18         | RANTES                                | 20304       |      | CCL5, SISd                        |
| E3, E4           | SDF-1                                 | 20315       |      | CXCL12, PBSF                      |
| E5, E6           | Complement Factor D (Sample Control)* | 11537       |      | Adipsin, DF, Adn                  |
| E7, E8           | gp130 (Sample Control)*               | 16195       |      | IL-6ST, CD130                     |
| E9, E10          | HSP60 (Sample Control)*               | 15510       |      | Hspd1                             |
| E11, E12         | Negative Control                      | N/A         |      | Control (-)                       |
| F1, F2           | Reference Spots                       | N/A         |      | RS                                |

## Supplementary Figure 1

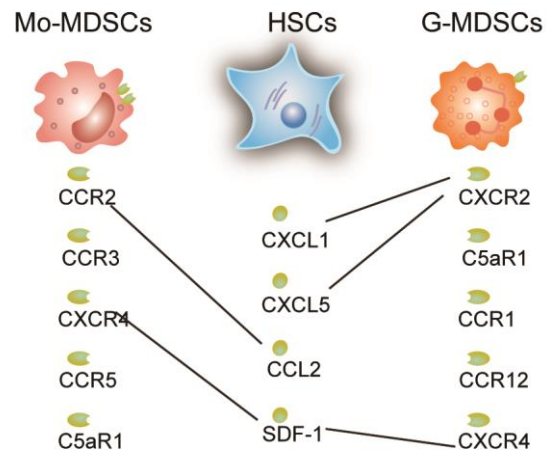

**Supplementary Fig. 1** Potential involvement of chemokine-chemokine receptor in MDSC migration induced by HSCs.

## Supplementary Figure 2

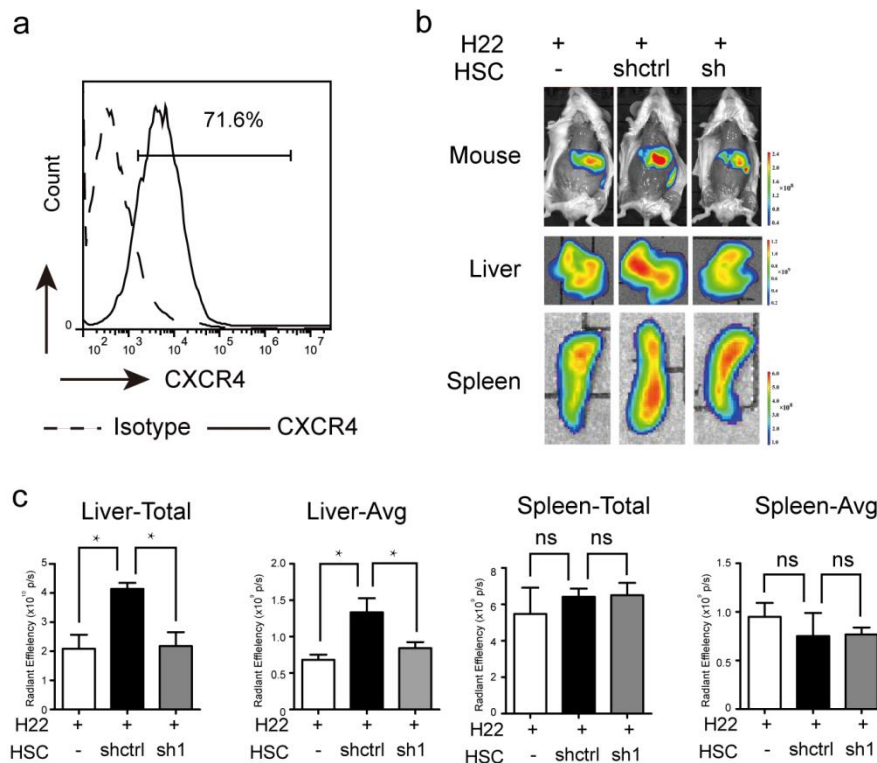

**Supplementary Fig. 2** The effect of HSCs on RAW 264.7 cell migration *in vivo*. **a** CXCR4 expression on RAW 264.7 cells detected by flow cytometry. **b** Shown are representative mice, livers and spleens. The mice were given an intrahepatic injection of  $1 \times 10^6$  H22 cells, H22 cells plus  $2 \times 10^5$  activated shctrl HSCs (shctrl) or SDF-1-knocked down HSCs (sh). After transfer of DiR-labeled RAW 264.7 cells, the signal was evaluated by IVIS. **c** Total and average signal intensity in the livers and spleens of tumor-bearing mice is presented.
